# Supplementary material for: Regulating the electronic properties of the WGe2N4 monolayer by adsorption of 4d transition metal atoms towards spintronic devices
Source: Royal Society of Chemistry journal article supplement (doi:10.1039/d3cp02686h), 2023-01-01
Supplement: d3cp02686h1.pdf [file d3cp02686h1.pdf]

Supporting Information for  
**Regulating the electronic properties of WGe<sub>2</sub>N<sub>4</sub> monolayer by  
adsorption of 4d transition metal atoms towards spintronic  
devices**

Jin-Lan Sun, Mi-Mi Dong, Yue Niu, Zong-Liang Li, Guang-Ping Zhang, Chuan-Kui  
Wang\*, Xiao-Xiao Fu\*

*Shandong Key Laboratory of Medical Physics and Image Processing & Shandong  
Provincial Engineering and Technical Center of Light Manipulations, School of  
Physics and Electronics, Shandong Normal University, Jinan 250358, China*

\*E-mail: ckwang@sdnu.edu.cn; fuxiaoxiao@sdnu.edu.cn

Table S1. The adsorption energies ( $E_a$ ), adsorption distances ( $D$ ), magnetic moments ( $M$ ) and band gaps ( $E_{\text{gap}}$ ) of the WGe<sub>2</sub>N<sub>4</sub> monolayer adsorbing 4d transition metal atoms (Y–Cd) with the most stable adsorption structures.

| TM                         | Y     | Zr    | Nb   | Mo    | Tc    | Ru    | Rh    | Pd    | Ag    | Cd    |
|----------------------------|-------|-------|------|-------|-------|-------|-------|-------|-------|-------|
| $E_a/\text{eV}$            | -2.66 | -1.93 | -1.6 | -0.56 | -1.00 | -1.80 | -1.93 | -1.60 | -0.49 | -0.30 |
| $D/\text{\AA}$             | 1.10  | 1.78  | 1.31 | 2.38  | 2.16  | 1.78  | 1.79  | 1.90  | 2.53  | 3.06  |
| $M/\mu_B$                  | 0.77  | 3.02  | 2.90 | 5.62  | 4.98  | 2.01  | 0.96  | 0.00  | -0.02 | 0.00  |
| $E_{\text{gap}}/\text{eV}$ | 0.00  | 0.00  | 0.00 | 0.00  | 0.09  | 0.12  | 0.18  | 0.66  | 0.00  | 0.60  |

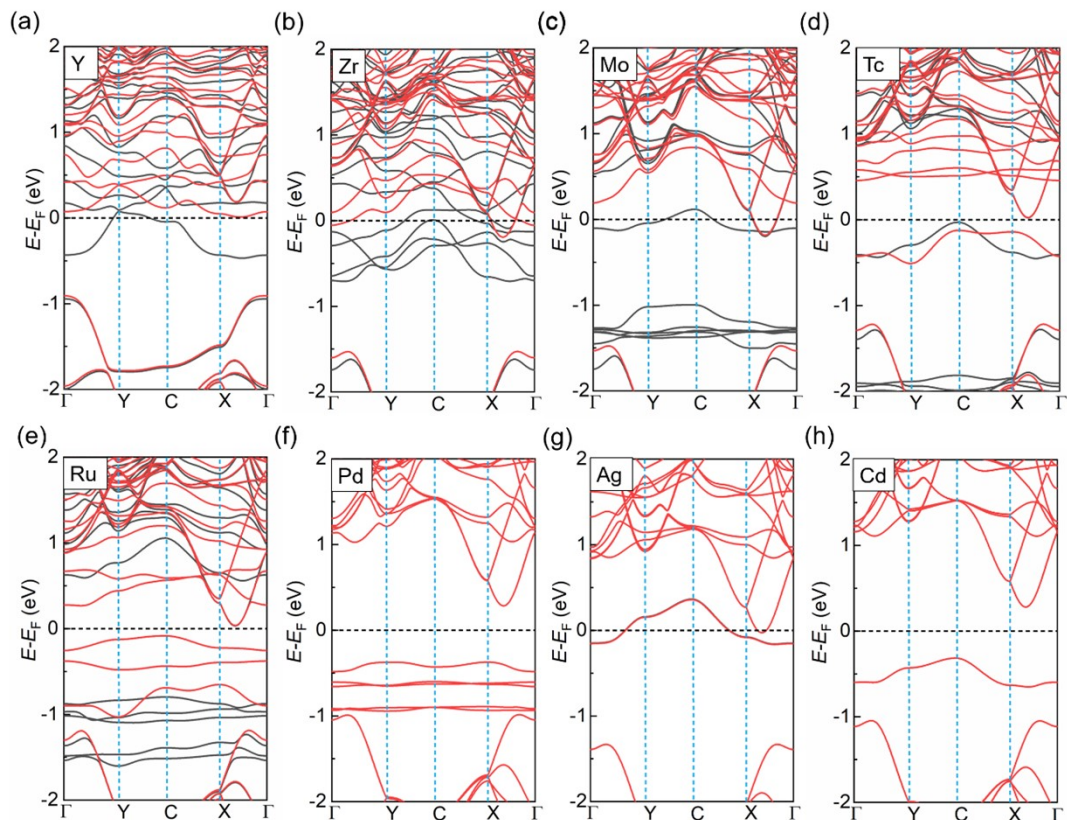

Fig. S1 The band structures of the  $WGe_2N_4$  monolayer with 4d transition metal adatoms (Y, Zr, Mo, Tc, Ru, Pd, Ag, and Cd).

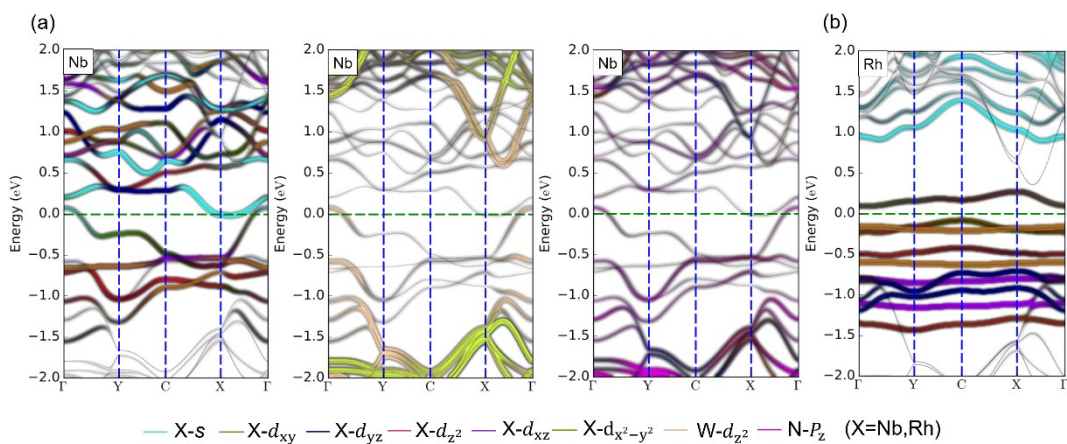

Fig. S2 The orbital projected band structures of the (a) Nb- and (b) Rh-adsorbed  $WGe_2N_4$  monolayer. In order to observe the occupation of the atomic orbitals of the Nb-adsorbed system more clearly, the occupation of the orbitals of Nb, W, and N atoms are plotted separately.

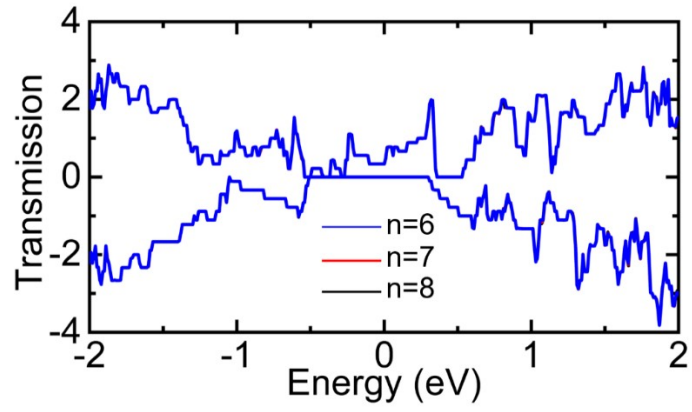

Fig. S3 The zero-bias transmission spectra of Sc-adsorbed  $WGe_2N_4$  device with the central region containing 6, 7, and 8 units with parallel magnetization configuration.
